# Supplementary material for: Accessing Lipophilicity and Biomimetic Chromatography Profile of Biologically Active Ingredients of Botanicals Used in the Treatment of Inflammatory Bowel Disease
Source: MDPI journal article supplement (doi:10.3390/ph15080965), 2022-08-04
Supplement: s1 [file s1]

## SUPPLEMENTARY MATERIAL

### Assessing Lipophilicity and Biomimetic Chromatography Profile of Biologically Active Ingredients of Botanicals Used in the Treatment of Inflammatory Bowel Disease

Mario-Livio Jeličić, Daniela Amidžić Klarić, Jelena Kovačić, Donatella Verbanac, Ana Mornar

**Table S1.** Verification data of HSA-HPAC and AGP-HPAC assays.

| Assay    | $t_{R1}^* \text{ (min)} \pm \text{RSD}^{**} \text{ (\%)} \quad n = 6$ | $t_{R2} \text{ (min)} \pm \text{RSD} \text{ (\%)} \quad n = 6$ | $R_s^{***} \pm \text{RSD} \text{ (\%)} \quad n = 6$ |
|----------|-----------------------------------------------------------------------|----------------------------------------------------------------|-----------------------------------------------------|
|          |                                                                       |                                                                |                                                     |
| HSA-HPAC | $6.03 \pm 0.56$                                                       | $6.69 \pm 0.56$                                                | $2.27 \pm 1.93$                                     |
| AGP-HPAC | $4.05 \pm 0.54$                                                       | $4.54 \pm 0.36$                                                | $1.63 \pm 1.04$                                     |

\* $t_R$  – retention time of peaks in the racemic mixture of warfarin

\*\*RSD – Relative Standard Deviation

\*\*\* $R_s$  – resolution factor
